# Supplementary material for: Variants at the APOE/C1/C2/C4 Locus Modulate Cholesterol Efflux Capacity Independently of High‐Density Lipoprotein Cholesterol
Source: PubMed Central journal article supplement — J Am Heart Assoc. 2018 Aug 18;7(16):e009545. doi: 10.1161/JAHA.118.009545 (PMC6201388; doi:10.1161/jaha.118.009545), 2018-08-18
Supplement: JAH3-7-e009545-s001.pdf [file JAH3-7-e009545-s001.pdf]

# **SUPPLEMENTAL MATERIAL**

## Data S1.

### Supplemental Methods.

In order to assess possible residual confounding in the association between the APOE/C1/C2/C4 variant and CEC when controlling for HDL-C and triglycerides that would be due to non-linear relationships between HDL-C and CEC and between triglycerides and CEC, we used non-parametric smoothing techniques which support a linear relationship for both parameters. In order to assess remaining non-linearity, we tested models with restricted cubic spline transformation for HDL-C and triglycerides. Results show that the spline transformation did not impact the significance of the APOE/C1/C2/C4 association. In order to assess whether there may be residual confounding due to effect modifiers, we tested models including interaction terms between HDL-C and other covariates, and between triglycerides and other covariates. Again, results show that the addition of the interaction terms did not impact the significance of the APOE/C1/C2/C4 association

## 1. METHODS

Residual confounding is a bias that remains after controlling for a confounding factor in a model. For a continuous confounder, residual bias may occur if the controlled factor is measured with error, or entered in the statistical model with inappropriate coding, or when it is coded by a linear term while its real effect corresponds to a non-linear shape.

### 1.1. Methodology

In this manuscript, the CEC (J774 stimulated) was transformed to normality using inverse normal transformation. The association between CEC and APOE/C1/C2/C4 variant was tested in phase1 and phase2 separately and then combined using an inverse variance meta-analysis method.

The following two models were tested:

#### Model 1

CEC ~ SNP + Age-squared + Sex + CAD status + Statins + PC1-10 + batches

#### Model 2

CEC ~ SNP + Age-squared + Sex + CAD status + Statins + PC1-10 + batches + HDL-C + Log (TG)  
where log (TG) is the natural log-transformed TG

To assess if there is any residual confounding in **Model 2**, we tested 4 other models. Three models including interaction between HDL and log (TG) and other covariates and one model including HDL and log (TG) splines:

#### Model 3

CEC ~ SNP + Age-squared + Sex + CAD status + Statins + PC1-10 + batches + HDL-C + Log (TG)  
+HDL \* log (TG)

#### Model 4

CEC ~ SNP + Age-squared + Sex + CAD status + Statins + PC1-10 + batches + HDL-C + Log (TG)  
+HDL \* log (TG) + age2\*HDL +age2 \* log (TG) + sex \*HDL +sex \*log (TG) +CAD status \*HDL  
+CAD status \*log (TG) +statin \*HDL +statin \*log (TG)

#### Model 5

Model 5 keeps only the significant interactions in Model 4, separately for phase 1 and phase 2.

#### Phase1:

CEC ~ SNP + Age-squared + Sex + CAD status + Statins + PC1-10 + batches + HDL-C + Log (TG)  
+HDL \* log (TG) + age2\*HDL + CAD status \*HDL

#### Phase2:

CEC ~ SNP + Age-squared + Sex + CAD status + Statins + PC1-10 + batches + HDL-C + Log (TG) + HDL \* log (TG) + sex \* HDL + statin \* log (TG)

**Model 6**

CEC ~ SNP + Age-squared + Sex + CAD status + Statins + PC1-10 + batches + HDL-C + Log (TG) + spline (HDL) + spline (log (TG))

**2. RESULTS**

**Table 2-1: Association between non-normalized CEC and ApoE\_rs445925 variant in phase1**

| Model  | Beta   | Std Err | P-value  |
|--------|--------|---------|----------|
| Model1 | 0.0241 | 0.0061  | 7.56E-05 |
| Model2 | 0.0114 | 0.0047  | 0.0162   |
| Model3 | 0.0112 | 0.0047  | 0.0184   |
| Model4 | 0.0110 | 0.0047  | 0.0196   |
| Model5 | 0.0104 | 0.0047  | 0.0268   |
| Model6 | 0.0109 | 0.0047  | 0.0204   |

**Table 2-2: Association between non-normalized CEC and ApoE\_rs445925 in phase2**

| Model  | Beta   | Std Err | P-value  |
|--------|--------|---------|----------|
| Model1 | 0.0265 | 0.0054  | 8.37E-07 |
| Model2 | 0.0178 | 0.0041  | 1.84E-05 |
| Model3 | 0.0177 | 0.0041  | 1.94E-05 |
| Model4 | 0.0177 | 0.0041  | 1.89E-05 |
| Model5 | 0.0176 | 0.0041  | 2.04E-05 |
| Model6 | 0.0177 | 0.0041  | 1.64E-05 |

**Table 2-3: Association between normalized CEC and ApoE\_rs445925 variant in phase1**

| Model  | Beta   | Std Err | P-value  |
|--------|--------|---------|----------|
| Model1 | 0.1776 | 0.0444  | 6.59E-05 |
| Model2 | 0.0848 | 0.0346  | 0.0145   |
| Model3 | 0.0829 | 0.0346  | 0.0166   |
| Model4 | 0.0821 | 0.0345  | 0.0173   |
| Model5 | 0.0772 | 0.0343  | 0.0246   |
| Model6 | 0.0809 | 0.0341  | 0.0180   |

**Table 2-4: Association between normalized CEC and ApoE\_rs445925 variant in phase2**

| Model  | Beta   | Std Err | P-value  |
|--------|--------|---------|----------|
| Model1 | 0.1659 | 0.0332  | 6.04E-07 |
| Model2 | 0.1114 | 0.0255  | 1.28E-05 |
| Model3 | 0.1108 | 0.0254  | 1.35E-05 |
| Model4 | 0.1107 | 0.0254  | 1.3E-05  |
| Model5 | 0.1103 | 0.0254  | 1.42E-05 |
| Model6 | 0.1105 | 0.0252  | 1.18E-05 |

**Table 2-5: Meta-analysis for the association between non-normalized CEC and ApoE\_rs445925 variant**

| Model   | Fixed effect p-value | Fixed effect BETA | Fixed effect STD | Random effect p-value | Random effect BETA | Random effect STD |
|---------|----------------------|-------------------|------------------|-----------------------|--------------------|-------------------|
| Model 1 | 2.52E-10             | 0.0255            | 0.0040           | 2.52E-10              | 0.0255             | 0.0040            |
| Model 2 | 1.49E-06             | 0.0150            | 0.0031           | 2.15E-06              | 0.0150             | 0.0032            |
| Model 3 | 1.82E-06             | 0.0149            | 0.0031           | 4.97E-06              | 0.0148             | 0.0032            |
| Model 4 | 1.92E-06             | 0.0148            | 0.0031           | 8.48E-06              | 0.0147             | 0.0033            |
| Model 5 | 3.05E-06             | 0.0145            | 0.0031           | 6.08E-05              | 0.0144             | 0.0036            |
| Model 6 | 1.8E-06              | 0.0147            | 0.0031           | 1.69E-05              | 0.0146             | 0.0034            |

**Table 2-6: Meta-analysis testing the association between normalized CEC and ApoE\_rs445925 variant**

| Model  | Fixed effect p-value | Fixed effect BETA | Fixed effect STD | Random effect p-value | Random effect BETA | Random effect STD |
|--------|----------------------|-------------------|------------------|-----------------------|--------------------|-------------------|
| Model1 | 1.56E-10             | 0.1701            | 0.0266           | 1.56E-10              | 0.1701             | 0.0266            |
| Model2 | 6.66E-07             | 0.1020            | 0.0205           | 6.66E-07              | 0.1020             | 0.0205            |
| Model3 | 8.19E-07             | 0.1010            | 0.0205           | 8.19E-07              | 0.1010             | 0.0205            |
| Model4 | 8.28E-07             | 0.1007            | 0.0204           | 8.28E-07              | 0.1007             | 0.0204            |
| Model5 | 1.34E-06             | 0.0986            | 0.0204           | 1.34E-06              | 0.0986             | 0.0204            |
| Model6 | 7.92E-07             | 0.1000            | 0.0203           | 7.92E-07              | 0.1000             | 0.0203            |

**Table S1. Demographics and clinical information for the participants involved in the study.**

|                                | MHI Biobank (phase 1) |            | MHI Biobank (phase 2) |             |
|--------------------------------|-----------------------|------------|-----------------------|-------------|
|                                | Controls              | Cases      | Controls              | Cases       |
| N                              | 996                   | 1000       | 883                   | 2589        |
| Mean age, years (SD)           | 66.0 (10.1)           | 66.8 (8.9) | 60.7 (10.8)           | 66.6 (8.4)  |
| Male sex, % (n)                | 72.0 (717)            | 72.6 (726) | 37.7 (333)            | 81.7 (2115) |
| Coronary artery disease, % (n) | 0 (0)                 | 100 (1000) | 0 (0)                 | 100 (2589)  |
| Hypertension, % (n)            | 62.2 (620)            | 74.0 (740) | 36.4 (321)            | 73.7 (1900) |
| Diabetes mellitus, % (n)       | 19.8 (197)            | 29.2 (292) | 8.2 (72)              | 27.8 (717)  |
| Dyslipidemia, % (n)            | 73.2 (729)            | 92.1 (921) | 39.0 (343)            | 91.7 (2361) |

All participants were recruited in the Montreal Heart Institute (MHI) Biobank and had four French-Canadian grandparents. For age, we provide means and standard deviations at recruitment. Coronary artery disease (CAD) is defined as previous diagnosis of myocardial infarction or revascularization procedures (percutaneous coronary intervention). Hypertension is defined as a previous diagnosis of hypertension, on antihypertensive therapy or with systolic blood pressure  $\geq 140$  mmHg or diastolic blood pressure  $\geq 90$  mmHg. Diabetes mellitus is defined as a previous diagnosis of diabetes or treatment with antidiabetic drugs. Dyslipidemia is defined as a previous diagnosis of hypercholesterolemia or treatment with lipid-lowering drugs. This table includes all participants for whom we had cholesterol efflux capacity (CEC) measures. For the genome-wide association studies (GWAS), we analyzed participants with CEC and genetic data available: 943 controls and 953 CAD cases in phase 1; 863 controls and 2,534 CAD cases in phase 2.

**Table S2. Technical variability of cholesterol efflux capacity assays assessed with QC sample (pooled normal human serum, apoB-depleted) in each assay batch (N=106).**

| <b>Efflux model - Component</b>     | <b>Intra-assay CV, median (%)</b> | <b>Intra-assay CV, mean (%)</b> | <b>Inter-assay CV, (%)</b> |
|-------------------------------------|-----------------------------------|---------------------------------|----------------------------|
| J774 - Basal                        | 6.6                               | 7.1                             | 18.1                       |
| J774 - cAMP-stimulated              | 6.2                               | 6.5                             | 18.4                       |
| J774 - ABCA1-dependent              | 4.9                               | 6.2                             | 22.0                       |
| BHK-ABCA1 - Mifepristone-stimulated | 6.0                               | 6.3                             | 22.2                       |

Intra-assay coefficient of variation (CV) is calculated from 4 QC efflux values per batch and the median or mean %CV of all batches is presented. Percent inter-assay CV is calculated from QC efflux values from all batches.

**Table S3. Proteins, and corresponding genes, found in HDL particles by proteomic analyses.<sup>2</sup>**

| <b>Protein</b> | <b>Gene</b>  | <b>Protein</b> | <b>Gene</b>     |
|----------------|--------------|----------------|-----------------|
| IPI00021841    | <i>APOA1</i> | IPI00020091    | <i>ORM2</i>     |
| IPI00021854    | <i>APOA2</i> | IPI00022431    | <i>AHSG</i>     |
| IPI00304273    | <i>APOA4</i> | IPI00305457    | <i>SERPINA1</i> |
| IPI00021842    | <i>APOE</i>  | IPI00022895    | <i>A1BG</i>     |
| IPI00021855    | <i>APOC1</i> | IPI00021885    | <i>FGA</i>      |
| IPI00021856    | <i>APOC2</i> | IPI00022463    | <i>TF</i>       |
| IPI00021857    | <i>APOC3</i> | IPI00296170    | <i>HPR</i>      |
| IPI00022731    | <i>APOC4</i> | IPI00022432    | <i>TTR</i>      |
| IPI00177869    | <i>APOL1</i> | IPI00298853    | <i>GC</i>       |
| IPI00030739    | <i>APOM</i>  | IPI00022229    | <i>APOB</i>     |
| IPI00299435    | <i>APOF</i>  | IPI00022434    | <i>ALB</i>      |
| IPI00006662    | <i>APOD</i>  | IPI00418163    | <i>C4B</i>      |
| IPI00298828    | <i>APOH</i>  | IPI00032258    | <i>C4A</i>      |
| IPI00291262    | <i>CLU</i>   | IPI00022395    | <i>C9</i>       |
| IPI00022331    | <i>LCAT</i>  | IPI00298971    | <i>VTN</i>      |
| IPI00006173    | <i>CETP</i>  | IPI00029863    | <i>SERPINF2</i> |
| IPI00022733    | <i>PLTP</i>  | IPI00022426    | <i>AMBP</i>     |
| IPI00022368    | -            | IPI00218192    | <i>ITIH4</i>    |
| IPI00452748    | <i>SAA1</i>  | IPI00032220    | <i>AGT</i>      |
| IPI00006146    | <i>SAA2</i>  | IPI00006114    | <i>SERPINF1</i> |
| IPI00019399    | <i>SAA4</i>  | IPI00032328    | <i>KNG1</i>     |
| IPI00218732    | <i>PON1</i>  | IPI00022420    | <i>RBP4</i>     |
| IPI00299778    | <i>PON3</i>  | IPI00337558    | <i>PCYOX1</i>   |
| IPI00164623    | <i>C3</i>    | IPI00022488    | <i>HPX</i>      |

**Table S4. Cholesterol efflux capacity association results stratified on coronary artery disease case-control status.**

| Chr:Pos_A1/A2_rsID         | J774 basal CONTROLS MODEL 1 |                     |           | J774 basal CASES MODEL 1 |                     |           |
|----------------------------|-----------------------------|---------------------|-----------|--------------------------|---------------------|-----------|
|                            | Freq1                       | BETA (SE)           | P-value   | Freq1                    | BETA (SE)           | P-value   |
| 2:28965430_G/C_rs75657792  | 0.0231                      | 0.3453<br>(0.1127)  | 0.002191  | 0.0179                   | 0.18<br>(0.0918)    | 0.04989   |
| 8:19819724_C/G_rs328       | 0.0962                      | 0.1376<br>(0.0564)  | 0.01471   | 0.0933                   | 0.2148<br>(0.0414)  | 2.06E-07  |
| 8:19821782_T/G_rs77069344  | 0.0998                      | 0.151<br>(0.0557)   | 0.006686  | 0.0972                   | 0.209<br>(0.0406)   | 2.73E-07  |
| 8:19844222_A/G_rs12678919  | 0.093                       | 0.1243<br>(0.0572)  | 0.02984   | 0.09                     | 0.2163<br>(0.042)   | 2.57E-07  |
| 15:58683366_A/G_rs1532085  | 0.3872                      | -0.1218<br>(0.0347) | 0.0004426 | 0.384                    | -0.1157<br>(0.0247) | 2.75E-06  |
| 15:58692148_G/T_rs35128881 | 0.2062                      | 0.1285<br>(0.0421)  | 2.30E-03  | 0.2132                   | 0.1194<br>(0.0293)  | 4.71E-05  |
| 15:58723939_G/A_rs2070895  | 0.2335                      | 0.0647<br>(0.0393)  | 0.0997    | 0.2275                   | 0.1616<br>(0.0285)  | 1.36E-08  |
| 16:56989590_C/T_rs247616   | 0.3254                      | 0.1775<br>(0.0359)  | 7.54E-07  | 0.3097                   | 0.1273<br>(0.0259)  | 8.77E-07  |
| 16:56993324_C/A_rs3764261  | 0.3265                      | 0.1746<br>(0.0359)  | 1.13E-06  | 0.3105                   | 0.1268<br>(0.0259)  | 9.38E-07  |
| 18:47109955_A/G_rs77960347 | 0.0132                      | 0.3438<br>(0.1493)  | 0.02127   | 0.0145                   | 0.3519<br>(0.1013)  | 0.0005125 |
|                            |                             |                     |           |                          |                     |           |
|                            |                             |                     |           |                          |                     |           |
| Chr:Pos_A1/A2_rsID         | J774 basal CONTROLS MODEL 2 |                     |           | J774 basal CASES MODEL 2 |                     |           |
|                            | Freq1                       | BETA (SE)           | P-value   | Freq1                    | BETA (SE)           | P-value   |
| 2:28965430_G/C_rs75657792  | 0.0231                      | 0.369<br>(0.1127)   | 0.001059  | 0.0179                   | 0.3595<br>(0.0916)  | 8.68E-05  |
| 8:19819724_C/G_rs328       | 0.0962                      | 0.014<br>(0.0565)   | 0.8038    | 0.0933                   | 0.1077<br>(0.0415)  | 0.009432  |
| 8:19821782_T/G_rs77069344  | 0.0998                      | 0.0164<br>(0.0558)  | 0.7691    | 0.0972                   | 0.0908<br>(0.0408)  | 0.02592   |
| 8:19844222_A/G_rs12678919  | 0.093                       | -0.0049<br>(0.0573) | 0.9318    | 0.09                     | 0.1104<br>(0.0421)  | 0.00871   |
| 15:58683366_A/G_rs1532085  | 0.3872                      | -0.0698<br>(0.0347) | 0.04438   | 0.384                    | -0.0379<br>(0.0247) | 0.1257    |
| 15:58692148_G/T_rs35128881 | 0.2062                      | 0.1712<br>(0.0421)  | 4.66E-05  | 0.2132                   | 0.0841<br>(0.0294)  | 0.004175  |
| 15:58723939_G/A_rs2070895  | 0.2335                      | -0.027<br>(0.0394)  | 0.4923    | 0.2275                   | 0.0857<br>(0.0285)  | 0.002695  |
| 16:56989590_C/T_rs247616   | 0.3254                      | -0.0028<br>(0.0361) | 0.939     | 0.3097                   | -0.0484<br>(0.026)  | 0.06266   |
| 16:56993324_C/A_rs3764261  | 0.3265                      | -0.006<br>(0.0361)  | 0.868     | 0.3104                   | -0.0476<br>(0.0259) | 0.06636   |
| 18:47109955_A/G_rs77960347 | 0.0133                      | 0.2955<br>(0.1493)  | 0.04782   | 0.0145                   | 0.3188<br>(0.1013)  | 0.001649  |
|                            |                             |                     |           |                          |                     |           |
|                            |                             |                     |           |                          |                     |           |
| Chr:Pos_A1/A2_rsID         | J774 stim. CONTROLS MODEL 1 |                     |           | J774 stim. CASES MODEL 1 |                     |           |
|                            | Freq1                       | BETA (SE)           | P-value   | Freq1                    | BETA (SE)           | P-value   |
| 2:27730940_T/C_rs1260326   | 0.4016                      | -0.0624<br>(0.0347) | 0.07174   | 0.3926                   | -0.0716<br>(0.0251) | 0.004405  |
| 11:116648917_G/C_rs964184  | 0.1271                      | -0.1135<br>(0.0506) | 0.02502   | 0.1396                   | -0.1152<br>(0.0343) | 0.0007764 |
| 11:116692334_C/T_rs5104    | 0.1375                      | -0.1667<br>(0.0495) | 0.000765  | 0.1373                   | -0.1003<br>(0.0349) | 0.004021  |
| 16:56989590_C/T_rs247616   | 0.3254                      | 0.1726<br>(0.0359)  | 1.54E-06  | 0.3098                   | 0.1085<br>(0.0259)  | 2.83E-05  |



|                           |                                         |                     |                |                                      |                     |                |
|---------------------------|-----------------------------------------|---------------------|----------------|--------------------------------------|---------------------|----------------|
| 16:56993324_C/A_rs3764261 | 0.3265                                  | 0.169<br>(0.0359)   | 2.52E-06       | 0.3105                               | 0.1094<br>(0.0259)  | 2.35E-05       |
| 19:45412079_C/T_rs7412    | 0.0845                                  | 0.1772<br>(0.0601)  | 0.003179       | 0.081                                | 0.2321<br>(0.0436)  | 1.03E-07       |
| 19:45415640_G/A_rs445925  | 0.1151                                  | 0.1795<br>(0.0522)  | 0.0005918      | 0.112                                | 0.1983<br>(0.0379)  | 1.65E-07       |
| 22:46627603_C/T_rs4253772 | 0.1153                                  | 0.101<br>(0.052)    | 0.05219        | 0.1141                               | 0.127<br>(0.0387)   | 0.001018       |
|                           |                                         |                     |                |                                      |                     |                |
|                           | <b>J774 stim. CONTROLS MODEL 2</b>      |                     |                | <b>J774 stim. CASES MODEL 2</b>      |                     |                |
| <b>Chr:Pos_A1/A2_rsID</b> | <b>Freq1</b>                            | <b>BETA (SE)</b>    | <b>P-value</b> | <b>Freq1</b>                         | <b>BETA (SE)</b>    | <b>P-value</b> |
| 2:27730940_T/C_rs1260326  | 0.4016                                  | -0.0699<br>(0.0347) | 0.04373        | 0.3926                               | -0.0235<br>(0.0252) | 0.3509         |
| 11:116648917_G/C_rs964184 | 0.1271                                  | -0.0927<br>(0.0507) | 0.06725        | 0.1395                               | -0.0386<br>(0.0344) | 0.2611         |
| 11:116692334_C/T_rs5104   | 0.1375                                  | -0.1229<br>(0.0496) | 0.01326        | 0.1373                               | -0.0104<br>(0.0349) | 0.7649         |
| 16:56989590_C/T_rs247616  | 0.3254                                  | 0.0214<br>(0.0361)  | 0.554          | 0.3098                               | -0.0454<br>(0.026)  | 0.08065        |
| 16:56993324_C/A_rs3764261 | 0.3265                                  | 0.0173<br>(0.0361)  | 0.6321         | 0.3105                               | -0.0436<br>(0.0259) | 0.09299        |
| 19:45412079_C/T_rs7412    | 0.0845                                  | 0.1044<br>(0.0602)  | 0.0826         | 0.081                                | 0.1918<br>(0.0437)  | 1.13E-05       |
| 19:45415640_G/A_rs445925  | 0.1151                                  | 0.1001<br>(0.0524)  | 0.05605        | 0.112                                | 0.1675<br>(0.0379)  | 1.01E-05       |
| 22:46627603_C/T_rs4253772 | 0.1153                                  | 0.0897<br>(0.052)   | 0.0848         | 0.1141                               | 0.0946<br>(0.0387)  | 0.01454        |
|                           |                                         |                     |                |                                      |                     |                |
|                           | <b>J774 ABCA1-dep. CONTROLS MODEL 1</b> |                     |                | <b>J774 ABCA1-dep. CASES MODEL 1</b> |                     |                |
| <b>Chr:Pos_A1/A2_rsID</b> | <b>Freq1</b>                            | <b>BETA (SE)</b>    | <b>P-value</b> | <b>Freq1</b>                         | <b>BETA (SE)</b>    | <b>P-value</b> |
| 2:27730940_T/C_rs1260326  | 0.4013                                  | -0.1286<br>(0.0345) | 0.0001978      | 0.3928                               | -0.056<br>(0.0251)  | 0.02585        |
| 8:126490972_A/T_rs2954029 | 0.4656                                  | -0.1019<br>(0.0336) | 0.002441       | 0.4477                               | -0.0835<br>(0.024)  | 0.0005021      |
| 11:116648917_G/C_rs964184 | 0.1271                                  | -0.1988<br>(0.0505) | 8.25E-05       | 0.1396                               | -0.2069<br>(0.0342) | 1.41E-09       |
| 11:116692334_C/T_rs5104   | 0.1376                                  | -0.1598<br>(0.0495) | 0.001255       | 0.1373                               | -0.1305<br>(0.0348) | 0.0001797      |
| 17:77657521_C/T_rs4889908 | 0.2898                                  | -0.1469<br>(0.0365) | 5.86E-05       | 0.2815                               | -0.0848<br>(0.0271) | 0.001733       |
| 19:45412079_C/T_rs7412    | 0.0845                                  | 0.1729<br>(0.0601)  | 0.00401        | 0.0811                               | 0.2414<br>(0.0436)  | 3.07E-08       |
| 19:45415640_G/A_rs445925  | 0.1151                                  | 0.1761<br>(0.0523)  | 0.0007521      | 0.112                                | 0.2165<br>(0.0378)  | 1.04E-08       |
|                           |                                         |                     |                |                                      |                     |                |
|                           | <b>J774 ABCA1-dep. CONTROLS MODEL 2</b> |                     |                | <b>J774 ABCA1-dep. CASES MODEL 2</b> |                     |                |
| <b>Chr:Pos_A1/A2_rsID</b> | <b>Freq1</b>                            | <b>BETA (SE)</b>    | <b>P-value</b> | <b>Freq1</b>                         | <b>BETA (SE)</b>    | <b>P-value</b> |
| 2:27730940_T/C_rs1260326  | 0.4015                                  | -0.0865<br>(0.0346) | 0.01248        | 0.3927                               | -0.0092<br>(0.0252) | 0.7159         |
| 8:126490972_A/T_rs2954029 | 0.4656                                  | -0.0842<br>(0.0336) | 0.01236        | 0.4477                               | -0.0468<br>(0.024)  | 0.0515         |
| 11:116648917_G/C_rs964184 | 0.1271                                  | -0.0993<br>(0.0506) | 0.04998        | 0.1396                               | -0.0668<br>(0.0343) | 0.05196        |
| 11:116692334_C/T_rs5104   | 0.1376                                  | -0.0899<br>(0.0496) | 0.07013        | 0.1373                               | -0.0307<br>(0.0349) | 0.3789         |
| 17:77657521_C/T_rs4889908 | 0.2897                                  | -0.1857<br>(0.0364) | 3.39E-07       | 0.2815                               | -0.1051<br>(0.027)  | 0.0001019      |
| 19:45412079_C/T_rs7412    | 0.0845                                  | 0.0976<br>(0.0602)  | 0.1049         | 0.081                                | 0.1776<br>(0.0437)  | 4.80E-05       |
| 19:45415640_G/A_rs445925  | 0.1151                                  | 0.0866<br>(0.0524)  | 0.0982         | 0.112                                | 0.1809<br>(0.0379)  | 1.82E-06       |
|                           |                                         |                     |                |                                      |                     |                |
|                           | <b>BHK stim. CONTROLS MODEL 1</b>       |                     |                | <b>BHK stim. CASES MODEL 1</b>       |                     |                |
| <b>Chr:Pos_A1/A2_rsID</b> | <b>Freq1</b>                            | <b>BETA (SE)</b>    | <b>P-value</b> | <b>Freq1</b>                         | <b>BETA (SE)</b>    | <b>P-value</b> |

|                             |                                   |                     |                |                                |                     |                |
|-----------------------------|-----------------------------------|---------------------|----------------|--------------------------------|---------------------|----------------|
| 11:116648917_G/C_rs964184   | 0.1295                            | -0.0948<br>(0.05)   | 0.05768        | 0.1396                         | -0.132<br>(0.0342)  | 0.0001117      |
| 11:116692334_C/T_rs5104     | 0.1383                            | -0.1801<br>(0.0495) | 0.0002708      | 0.1374                         | -0.1493<br>(0.0347) | 1.73E-05       |
| 16:56993324_C/A_rs3764261   | 0.3289                            | 0.1538<br>(0.0359)  | 1.81E-05       | 0.3119                         | 0.0941<br>(0.0258)  | 0.0002663      |
| 18:47109955_A/G_rs77960347  | 0.0136                            | 0.5513<br>(0.1473)  | 0.0001817      | 0.0146                         | 0.2218<br>(0.1004)  | 0.02714        |
| 19:45412079_C/T_rs7412      | 0.0844                            | 0.1739<br>(0.0599)  | 0.003716       | 0.0827                         | 0.269<br>(0.0431)   | 4.55E-10       |
| 19:45426792_G/A_rs141622900 | 0.0587                            | 0.2387<br>(0.0722)  | 0.0009406      | 0.0584                         | 0.3058<br>(0.0509)  | 1.85E-09       |
| 20:44554015_T/C_rs6065906   | 0.221                             | -0.0581<br>(0.0408) | 0.1541         | 0.2128                         | -0.0744<br>(0.0295) | 0.01173        |
| 20:44570192_C/T_rs6073966   | 0.1986                            | -0.0567<br>(0.0419) | 0.1762         | 0.1951                         | -0.0788<br>(0.0304) | 0.009457       |
|                             |                                   |                     |                |                                |                     |                |
|                             | <b>BHK stim. CONTROLS MODEL 2</b> |                     |                | <b>BHK stim. CASES MODEL 2</b> |                     |                |
| <b>Chr:Pos_A1/A2_rsID</b>   | <b>Freq1</b>                      | <b>BETA (SE)</b>    | <b>P-value</b> | <b>Freq1</b>                   | <b>BETA (SE)</b>    | <b>P-value</b> |
| 11:116648917_G/C_rs964184   | 0.1295                            | -0.0403<br>(0.05)   | 0.4198         | 0.1396                         | -0.0503<br>(0.0342) | 0.1422         |
| 11:116692334_C/T_rs5104     | 0.1383                            | -0.141<br>(0.0495)  | 0.004423       | 0.1374                         | -0.0749<br>(0.0348) | 0.03141        |
| 16:56993324_C/A_rs3764261   | 0.3288                            | 0.0023<br>(0.0361)  | 0.9487         | 0.3119                         | -0.0399<br>(0.0258) | 0.1222         |
| 18:47109955_A/G_rs77960347  | 0.0136                            | 0.5381<br>(0.1472)  | 0.0002578      | 0.0146                         | 0.0991<br>(0.1005)  | 0.3241         |
| 19:45412079_C/T_rs7412      | 0.0844                            | 0.0941<br>(0.06)    | 0.1169         | 0.0827                         | 0.2155<br>(0.0432)  | 6.26E-07       |
| 19:45426792_G/A_rs141622900 | 0.0587                            | 0.1435<br>(0.0723)  | 0.04729        | 0.0584                         | 0.2768<br>(0.0509)  | 5.49E-08       |
| 20:44554015_T/C_rs6065906   | 0.221                             | -0.012<br>(0.0408)  | 0.7686         | 0.2128                         | -0.1284<br>(0.0295) | 1.33E-05       |
| 20:44570192_C/T_rs6073966   | 0.1986                            | -0.0268<br>(0.042)  | 0.5232         | 0.1951                         | -0.1291<br>(0.0303) | 2.07E-05       |

Chromosome and position are on build hg19 of the human genome. Allele frequency (Freq1) and the direction of the effect (BETA) are for allele A2. Statistical models 1 and 2 are defined in the **Methods** section. For these analyses, there were maxima of 1,752 controls and 3,433 cases.

**Table S5. Association results between variants associated with cholesterol efflux capacity and HDL-cholesterol levels in 5,168 French Canadians from the MHI Biobank.**

| Chr:Pos_A1/A2_rsID          | Freq1  | Effect  | StdErr | P-value   |
|-----------------------------|--------|---------|--------|-----------|
| 2:27730940_T/C_rs1260326    | 0.3957 | 0.0014  | 0.0204 | 0.9441    |
| 2:28965430_G/C_rs75657792   | 0.0195 | 0.0497  | 0.0712 | 0.4851    |
| 8:19819724_C/G_rs328        | 0.0942 | 0.2378  | 0.0333 | 9.08E-13  |
| 8:19821782_T/G_rs77069344   | 0.098  | 0.245   | 0.0328 | 7.36E-14  |
| 8:19844222_A/G_rs12678919   | 0.091  | 0.2339  | 0.0338 | 4.45E-12  |
| 8:126490972_A/T_rs2954029   | 0.4539 | 0.064   | 0.0195 | 0.001059  |
| 11:116648917_G/C_rs964184   | 0.1352 | 0.0947  | 0.0284 | 0.0008485 |
| 11:116692334_C/T_rs5104     | 0.1372 | -0.0077 | 0.0286 | 0.7886    |
| 15:58683366_A/G_rs1532085   | 0.3853 | -0.1222 | 0.0201 | 1.19E-09  |
| 15:58692148_G/T_rs35128881  | 0.2108 | 0.0589  | 0.0241 | 0.01457   |
| 15:58723939_G/A_rs2070895   | 0.2296 | 0.1309  | 0.023  | 1.35E-08  |
| 16:56989590_C/T_rs247616    | 0.315  | 0.2145  | 0.0209 | 8.97E-25  |
| 16:56993324_C/A_rs3764261   | 0.3159 | 0.2128  | 0.0209 | 1.90E-24  |
| 17:77657521_C/T_rs4889908   | 0.2843 | -0.0034 | 0.0218 | 0.8767    |
| 18:47109955_A/G_rs77960347  | 0.014  | 0.2042  | 0.0839 | 0.01493   |
| 19:45412079_C/T_rs7412      | 0.0821 | 0.0082  | 0.0354 | 0.8167    |
| 19:45415640_G/A_rs445925    | 0.113  | 0.0186  | 0.0308 | 0.5447    |
| 19:45426792_G/A_rs141622900 | 0.0578 | -0.0222 | 0.042  | 0.5977    |
| 20:44554015_T/C_rs6065906   | 0.2149 | -0.0278 | 0.024  | 0.2466    |
| 20:44570192_C/T_rs6073966   | 0.1955 | -0.0276 | 0.0247 | 0.2645    |
| 22:46627603_C/T_rs4253772   | 0.1144 | 0.0313  | 0.0311 | 0.3136    |

Only variants highlighted in **Tables 1-3** of the main article are presented. HDL-C levels were inverse normal-transformed after correction for sex, age-squared, coronary artery disease status, technical batches, statin treatment, and the first ten principal components. We applied an additive genetic model. Chromosome and position are on build hg19 of the human genome. Allele frequency (Freq1) and the direction of the effect are for allele A2.

**Table S6. Association results between variants associated with cholesterol efflux capacity and triglyceride (TG) levels in 5,168 French Canadians from the MHI Biobank.**

| Chr:Pos_A1/A2_rsID          | Freq1  | Effect  | StdErr | P-value  |
|-----------------------------|--------|---------|--------|----------|
| 2:27730940_T/C_rs1260326    | 0.3958 | -0.0822 | 0.0203 | 5.21E-05 |
| 2:28965430_G/C_rs75657792   | 0.0195 | -0.1005 | 0.0712 | 0.1581   |
| 8:19819724_C/G_rs328        | 0.0942 | -0.1824 | 0.0334 | 4.52E-08 |
| 8:19821782_T/G_rs77069344   | 0.098  | -0.17   | 0.0328 | 2.27E-07 |
| 8:19844222_A/G_rs12678919   | 0.091  | -0.1736 | 0.0339 | 2.96E-07 |
| 8:126490972_A/T_rs2954029   | 0.4539 | -0.0804 | 0.0195 | 3.85E-05 |
| 11:116648917_G/C_rs964184   | 0.1352 | -0.2795 | 0.0282 | 3.34E-23 |
| 11:116692334_C/T_rs5104     | 0.1372 | -0.162  | 0.0285 | 1.24E-08 |
| 15:58683366_A/G_rs1532085   | 0.3853 | 0.036   | 0.0201 | 0.07377  |
| 15:58692148_G/T_rs35128881  | 0.2108 | 0.0137  | 0.0241 | 0.571    |
| 15:58723939_G/A_rs2070895   | 0.2296 | 0.0008  | 0.0231 | 0.9718   |
| 16:56989590_C/T_rs247616    | 0.315  | 0.0044  | 0.0211 | 0.8339   |
| 16:56993324_C/A_rs3764261   | 0.3159 | 0.0056  | 0.0211 | 0.7898   |
| 17:77657521_C/T_rs4889908   | 0.2843 | 0.0206  | 0.0218 | 0.344    |
| 18:47109955_A/G_rs77960347  | 0.014  | 0.0618  | 0.0839 | 0.4618   |
| 19:45412079_C/T_rs7412      | 0.0821 | 0.1721  | 0.0353 | 1.10E-06 |
| 19:45415640_G/A_rs445925    | 0.113  | 0.1401  | 0.0307 | 5.06E-06 |
| 19:45426792_G/A_rs141622900 | 0.0578 | 0.21    | 0.0419 | 5.31E-07 |
| 20:44554015_T/C_rs6065906   | 0.2149 | 0.0226  | 0.024  | 0.3469   |
| 20:44570192_C/T_rs6073966   | 0.1955 | 0.029   | 0.0247 | 0.2408   |
| 22:46627603_C/T_rs4253772   | 0.1144 | 0.0546  | 0.0311 | 0.07867  |

Only variants highlighted in **Tables 1-3** of the main article are presented. TG levels were inverse normal-transformed after correction for sex, age-squared, coronary artery disease status, technical batches, statin treatment, and the first ten principal components. We applied an additive genetic model. Chromosome and position are on build hg19 of the human genome. Allele frequency (Freq1) and the direction of the effect are for allele A2.

**Table S7. Association results between HDL-C-associated SNPs that were reported previously to be nominally associated with cholesterol efflux capacity (CEC) in 850 individuals from GRAPHIC.<sup>3</sup>**

| SNP        | Chr.<br>(position) | A1/A2 | EAF     | Model 1 |        |          | Model 2 (adjusted for HDL-C and TG) |        |        |
|------------|--------------------|-------|---------|---------|--------|----------|-------------------------------------|--------|--------|
|            |                    |       |         | BETA    | SE     | P        | BETA                                | SE     | P      |
| rs13326165 | 3 (52532118)       | A/G   | 0.2123  | -0.0118 | 0.0241 | 0.6238   | -0.0152                             | 0.0244 | 0.532  |
| rs13107325 | 4<br>(103188709)   | T/C   | 0.08273 | 0.0763  | 0.0383 | 0.04658  | 0.0587                              | 0.0388 | 0.13   |
| rs6450176  | 5 (53298025)       | A/G   | 0.76299 | -0.0117 | 0.023  | 0.611    | 0                                   | 0.0234 | 0.9985 |
| rs605066   | 6<br>(139829666)   | T/C   | 0.60377 | 0.0122  | 0.02   | 0.5416   | 0.022                               | 0.0202 | 0.2758 |
| rs581080   | 9 (15305378)       | C/G   | 0.61722 | 0.0175  | 0.0261 | 0.5023   | 0.0119                              | 0.0262 | 0.6495 |
| rs970548   | 10<br>(46013277)   | A/C   | 0.26224 | 0.0056  | 0.0226 | 0.8036   | -0.0193                             | 0.0228 | 0.3968 |
| rs1532085  | 15<br>(58683366)   | A/G   | 0.38563 | -0.0651 | 0.0204 | 0.0014   | -0.0127                             | 0.0202 | 0.5302 |
| rs3764261  | 16<br>(56993324)   | A/C   | 0.68461 | -0.1301 | 0.0209 | 4.93E-10 | 0.0201                              | 0.0211 | 0.3389 |
| rs7255436  | 19 (8433196)       | A/C   | 0.51263 | -0.0257 | 0.0194 | 0.1854   | -0.0015                             | 0.0196 | 0.9404 |
| rs737337   | 19<br>(11347493)   | T/C   | 0.0705  | -0.0231 | 0.0392 | 0.555    | 0.0083                              | 0.0394 | 0.8331 |

Association results for CEC (J774-stimulated assay) were generated using data from 5,293 French-Canadian individuals from the Montreal Heart Institute Biobank. Coordinates are for build hg19 of the human genome. Alleles are on the positive strand. The effect allele frequency (EAF) and the direction of the effect size (beta) are for allele A2. Model 1 is adjusted for sex, age-squared, coronary artery disease status, experimental batches, statin treatment, and the first 10 principal components. Model 2 includes the same covariates as Model 1, but also HDL-cholesterol and triglyceride (TG) levels. SE, standard error.

Figure S1. Chromosome conformation (Hi-C) data from human liver obtained from the HUGIn browser<sup>1</sup> around SNP rs75657792, which is associated with J774-basal CEC values.

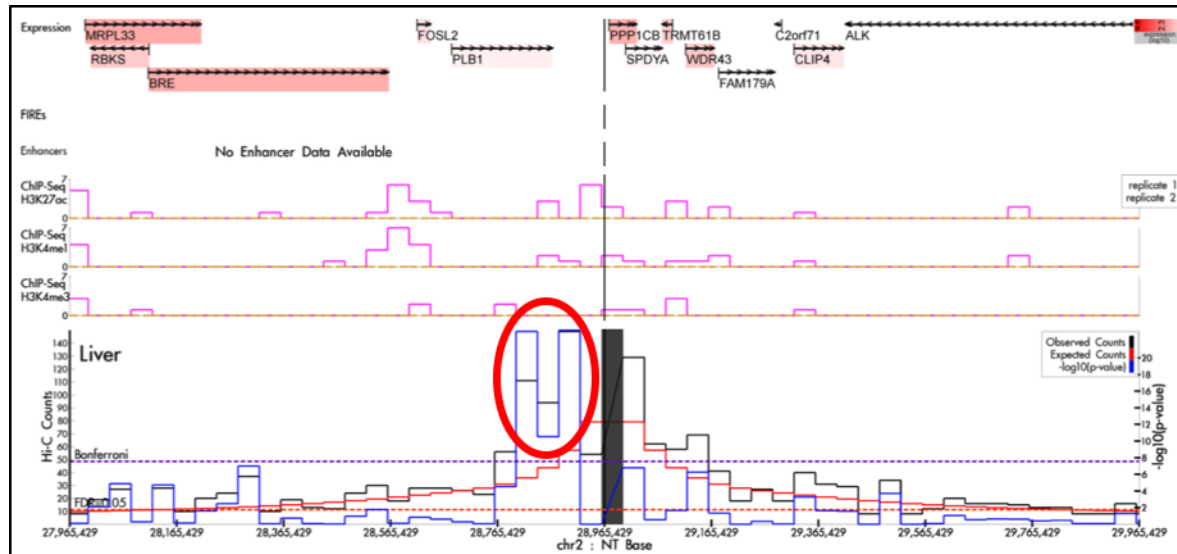

The top panel represents the gene at the locus (shades of red indicate expression levels in human liver). Histone tail marks obtained by ChIP-seq are represented in the middle panel. The Hi-C data is summarized in the bottom panel. The black rectangle corresponds to the anchor point and includes rs75657792. The black and red lines indicate the number of observed and expected Hi-C contacts between the anchor point and the corresponding regions. The line in blue corresponds to the  $-\log_{10}(P\text{-value})$ . We can observe two strong Hi-C signals between the anchor point and the *PLB1* gene (red oval).

### Supplemental References:

1. Martin JS, Xu Z, Reiner AP, Mohlke KL, Sullivan P, Ren B, Hu M, Li Y. Hugin: Hi-c unifying genomic interrogator. *Bioinformatics*. 2017;33:3793-3795 -
2. Vaisar T, Pennathur S, Green PS, Gharib SA, Hoofnagle AN, Cheung MC, Byun J, Vuletic S, Kassim S, Singh P, Chea H, Knopp RH, Brunzell J, Geary R, Chait A, Zhao XQ, Elkon K, Marcovina S, Ridker P, Oram JF, Heinecke JW. Shotgun proteomics implicates protease inhibition and complement activation in the antiinflammatory properties of hdl. *J Clin Invest*. 2007;117:746-756 -
3. Koekemoer AL, Codd V, Masca NGD, Nelson CP, Musameh MD, Kaess BM, Hengstenberg C, Rader DJ, Samani NJ. Large-scale analysis of determinants, stability, and heritability of high-density lipoprotein cholesterol efflux capacity. *Arterioscler Thromb Vasc Biol*. 2017;37:1956-1962 -
